# Supplementary material
Source: PubMed Central journal article supplement (PMC3320944)
Supplement: supp_M111.336834_jbc.M111.336834-1.pdf [file supp_M111.336834_jbc.M111.336834-1.pdf]

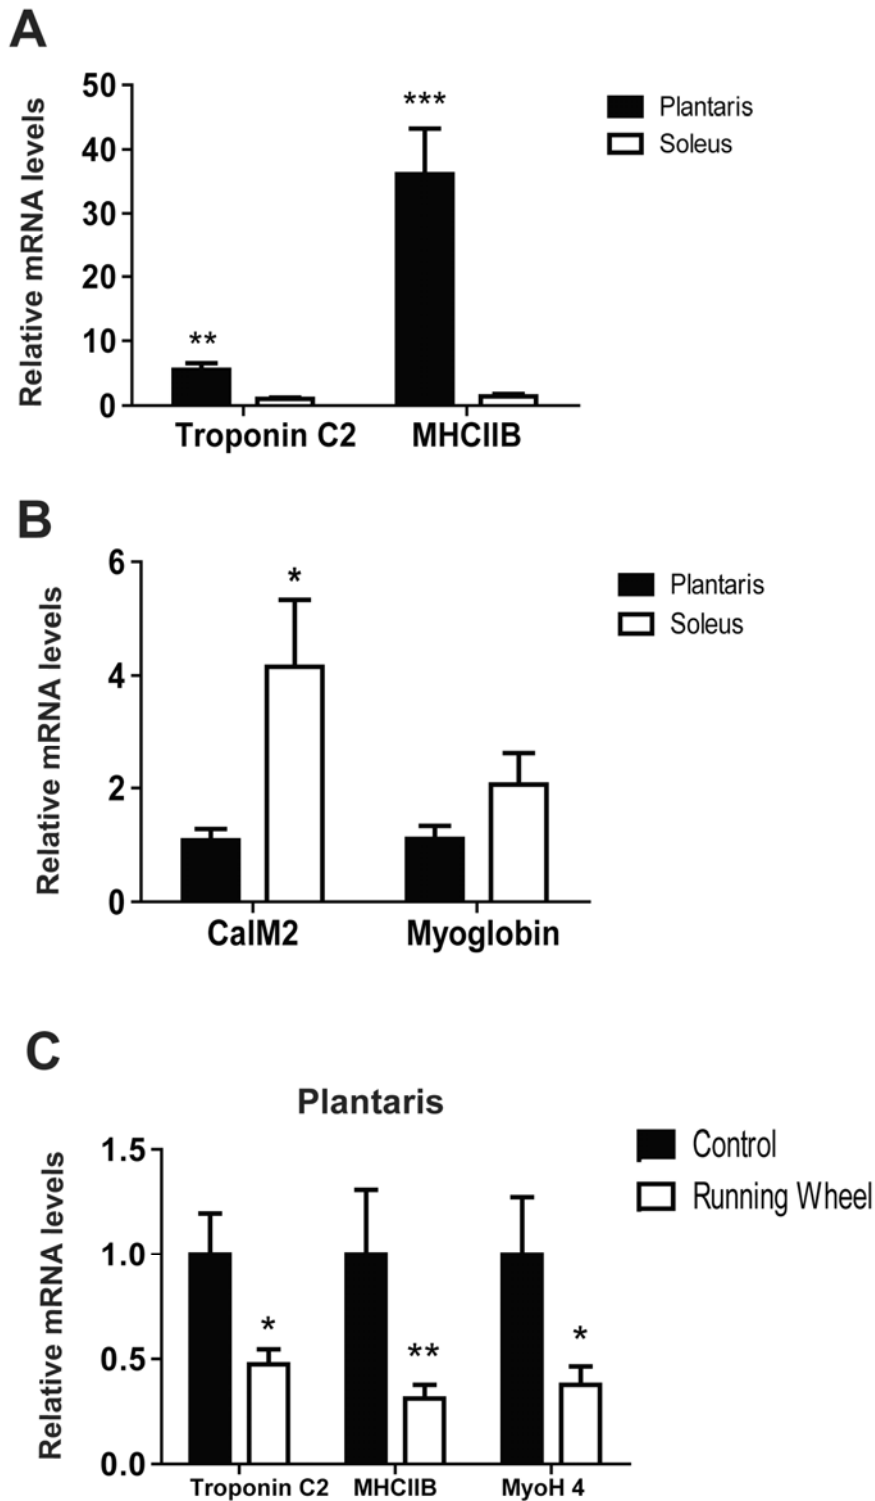

**Figure S1.** Differential expressions of marker genes in slow-twitch/oxidative (soleus) and fast-twitch/glycolytic (plantaris) muscle fibers. (A) Preferential expression of troponin C2 and myosin heavy chain type IIB (MHCIIIB) transcripts in isolated plantaris relative to soleus (n=5). (B) Preferential expression of calmodulin 2 (CalM2) and myoglobin in soleus relative to plantaris (n=5). (C) Exercise (via access to a running wheel for 2 weeks) reduced the expression of three marker genes for fast-twitch fiber (troponin C2, MHCIIIB, and MyoH4) due to exercise-induced muscle fiber type switching (n=5). Control mice had only access to a locked wheel (n=5). All qPCR data were normalized to 18S rRNA and shown as mean  $\pm$  SE (\*p<0.05; \*\*p<0.01; \*\*\*p<0.005).

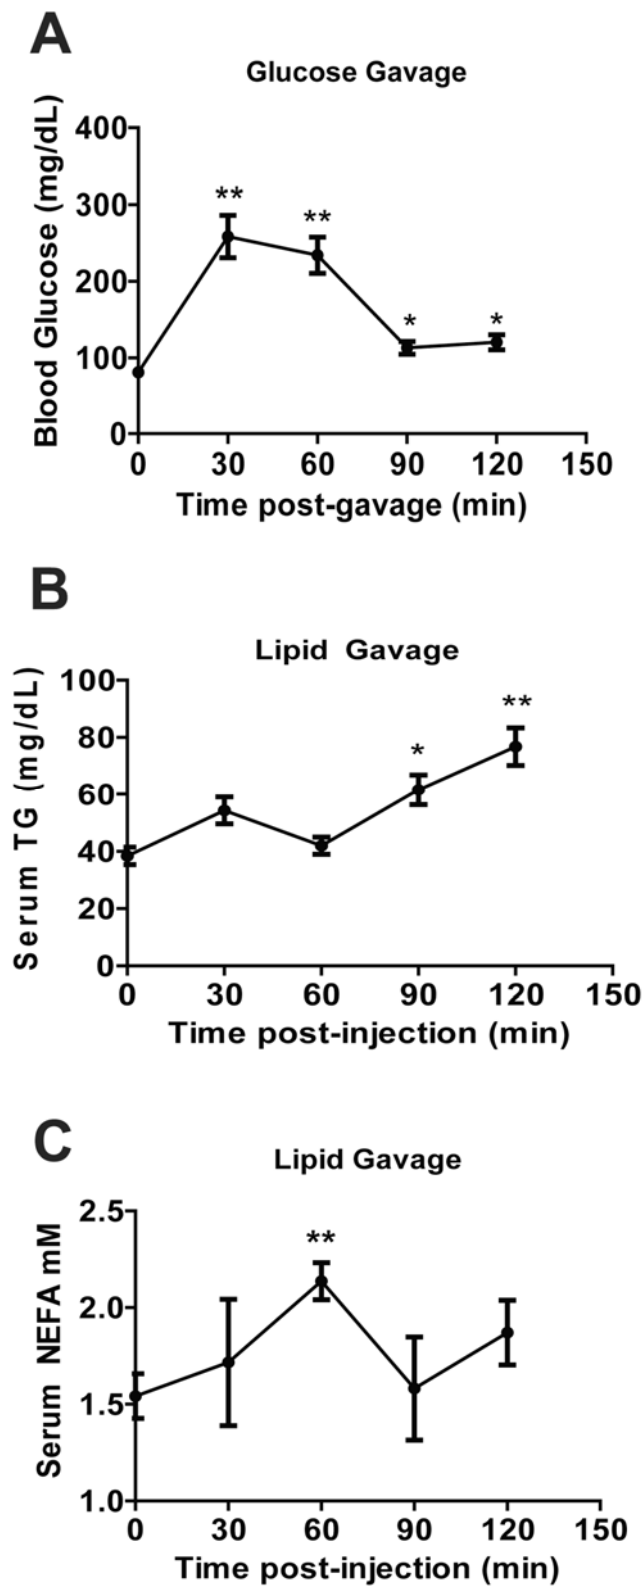

**Figure S2.** Blood glucose (A), serum triglyceride (B) and NEFA (C) concentrations in mice gavaged with glucose (A) or emulsified intralipid (B-C). All data were expressed as mean  $\pm$  SE (\* $p$ <0.05; \*\* $p$ <0.01).
